# Supplementary material for: Evolution of HIV-1 within untreated individuals and at the population scale in Uganda
Source: PubMed Central journal article supplement (PMC6082572; doi:10.1371/journal.ppat.1007167), 2018-07-27

**p24**

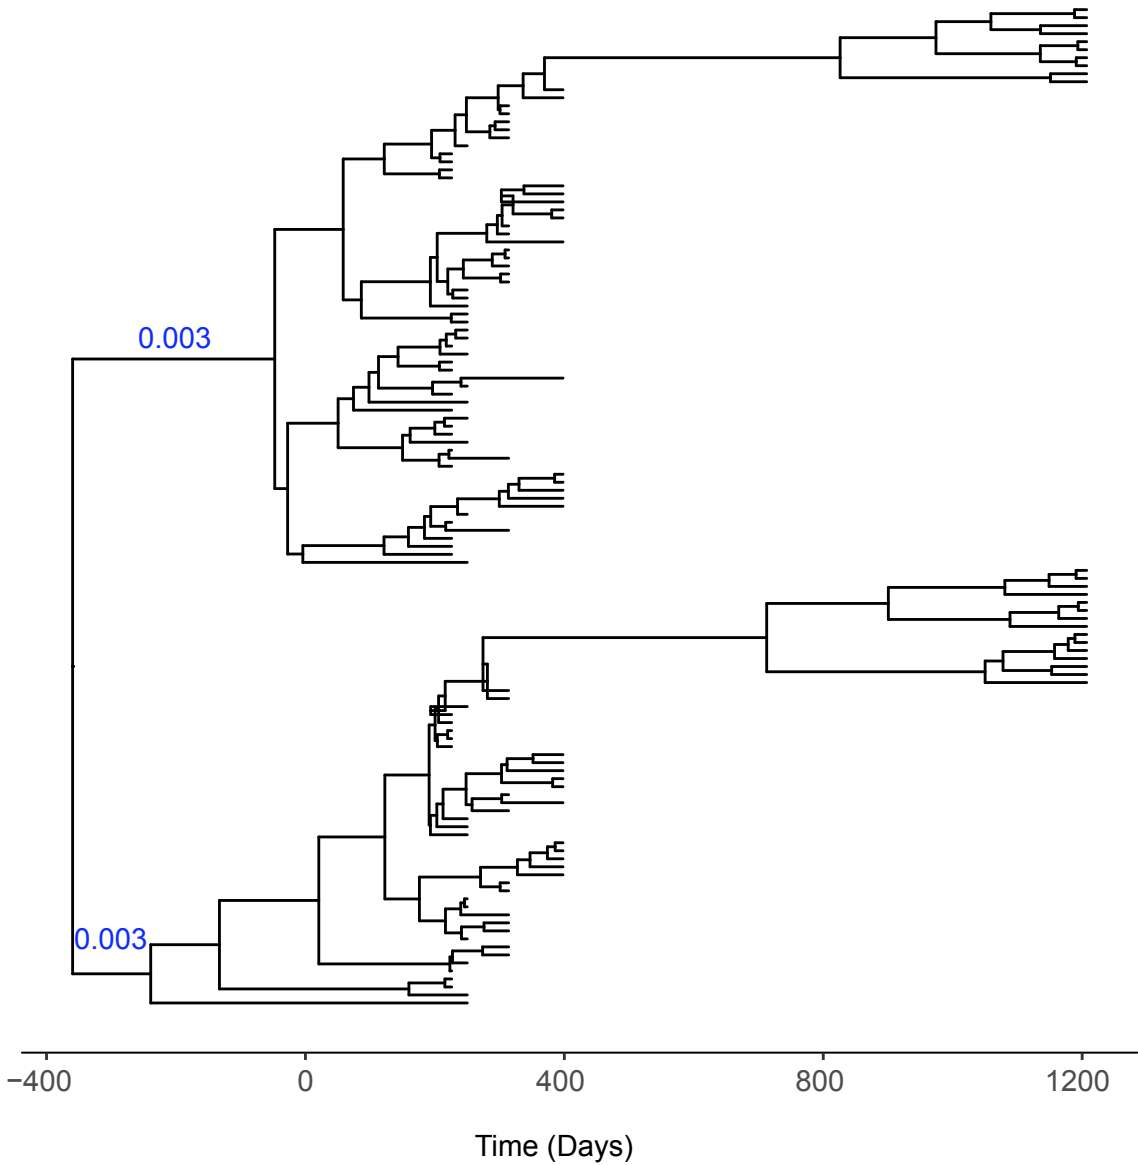

**gp41**

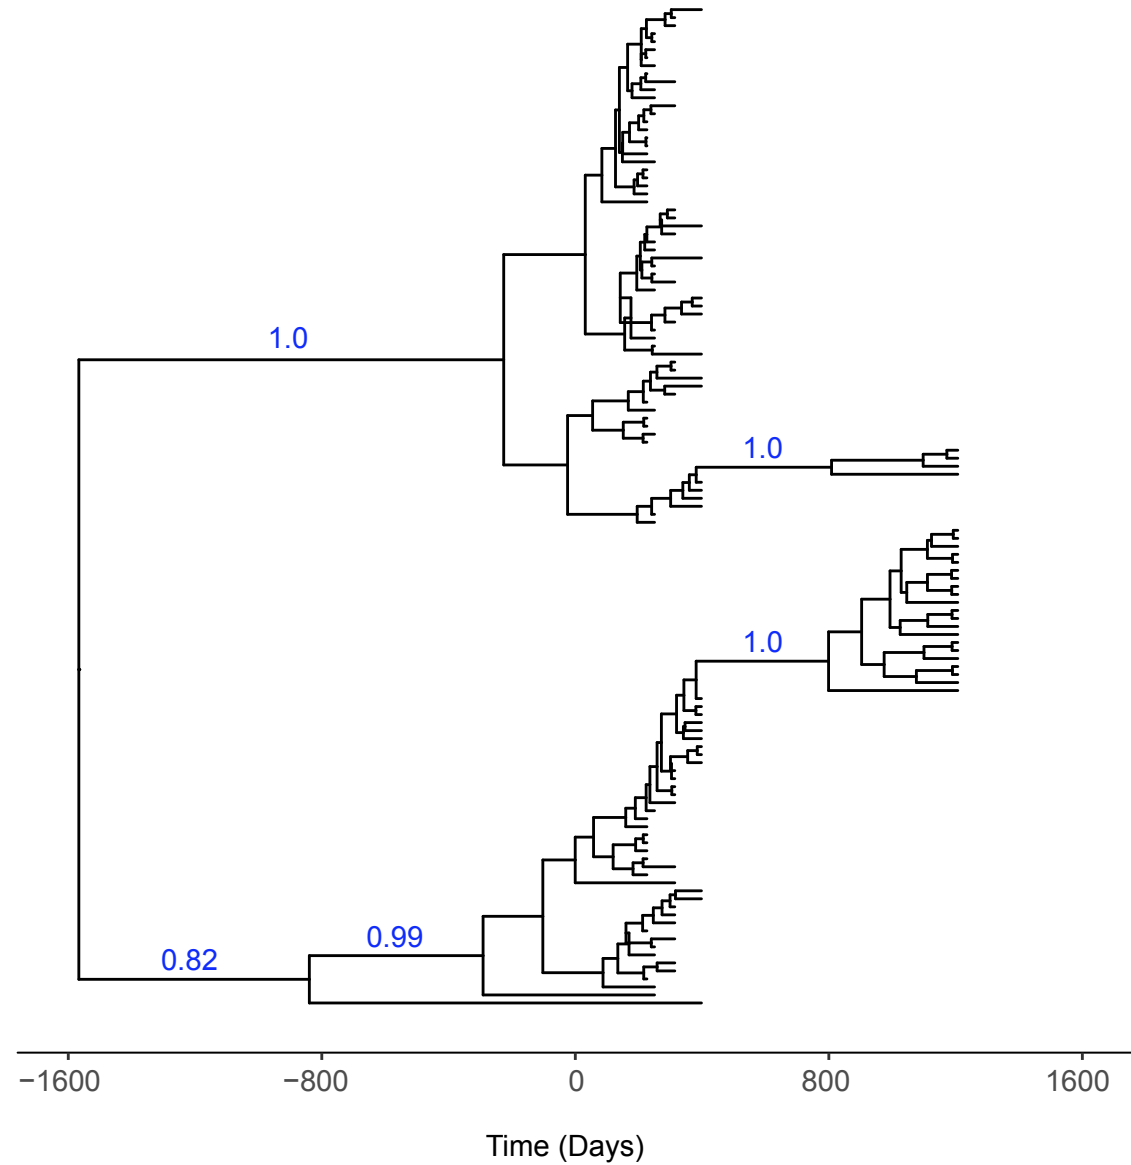

Supplement: ppat.1007167.s003.pdf [file ppat.1007167.s003.pdf]
