# Supplementary material for: Evolution of HIV-1 within untreated individuals and at the population scale in Uganda
Source: PubMed Central journal article supplement (PMC6082572; doi:10.1371/journal.ppat.1007167), 2018-07-27

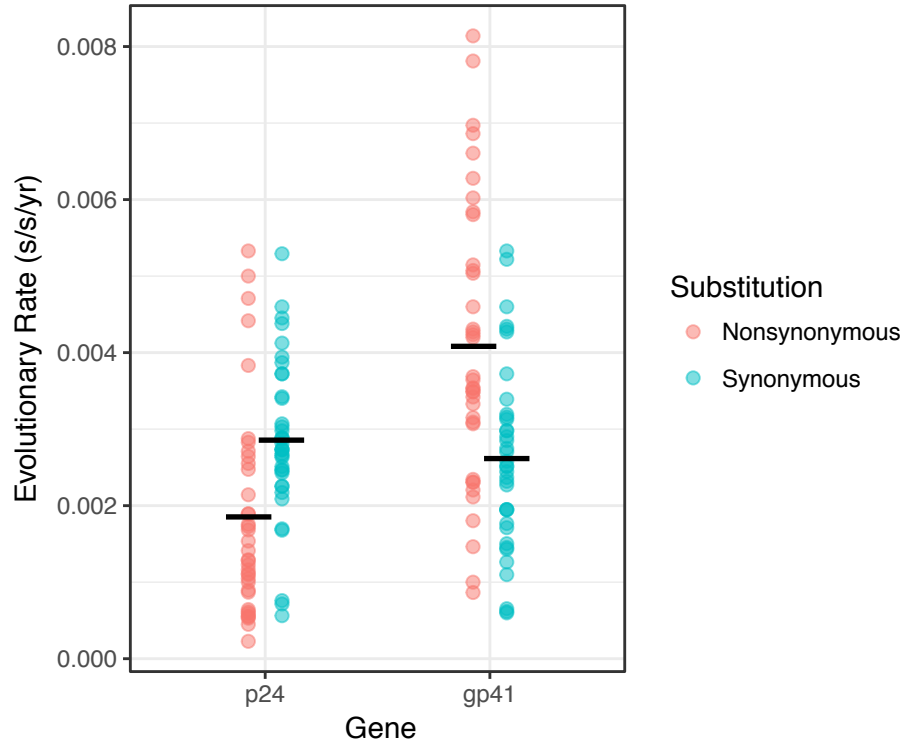

Supplement: ppat.1007167.s005.pdf [file ppat.1007167.s005.pdf]
